# Supplementary material
Source: MDPI journal article supplement (https://www.mdpi.com/2077-0472/14/1/58)
Supplement: s1 [file s1]

# Suppressive Activity of *Glechoma hederacea* Extracts against the Phytopathogenic Oomycete *Plasmopara viticola*, and First Screening of the Active Metabolites

Jesús G. Zorrilla <sup>1,2</sup>, Oscar Giovannini <sup>3</sup>, Stefano Nadalini <sup>3,4</sup>, Alberto Zanini <sup>4</sup>, Maria Teresa Russo <sup>1</sup>, Marco Masi <sup>1\*</sup>, Gerardo Puopolo <sup>3,4\*</sup>, and Alessio Cimmino <sup>1</sup>

<sup>1</sup> Department of Chemical Sciences, University of Naples Federico II, Complesso Universitario Monte S. Angelo, Via Cintia, 80126 Naples, Italy; mariateresa.russo2@unina.it (M.T.R.); alessio.cimmino@unina.it (A.C.)

<sup>2</sup> Allelopathy Group, Department of Organic Chemistry, Facultad de Ciencias, Institute of Biomolecules (INBIO), University of Cadiz, C/Avenida República Saharaui, s/n, 11510 Puerto Real, Spain; jesús.zorrilla@uca.es (J.G.Z.)

<sup>3</sup> Research and Innovation Centre, Fondazione Edmund Mach, Via E. Mach 1, San Michele all'Adige 38098, Italy; oscar.giovannini@fmach.it (O.G.)

<sup>4</sup> Center Agriculture Food Environment (C3A), University of Trento, Via E. Mach 1, San Michele all'Adige 38098, Italy; stefano.nadalini@unitn.it (S.N.); alberto.zanini@studenti.unitn.it (A.Z.)

\* Correspondence: marco.masi@unina.it (M.M.); gerardo.puopolo@unitn.it (G.P.)

## Index

|                                                                                                                                                            |   |
|------------------------------------------------------------------------------------------------------------------------------------------------------------|---|
| <b>Figure S1.</b> <sup>1</sup> H NMR spectrum of carvacrol in CDCl <sub>3</sub> (400 MHz) .....                                                            | 2 |
| <b>Figure S2.</b> <sup>1</sup> H NMR spectrum of cirsimaritin in CD <sub>3</sub> OD (400 MHz).....                                                         | 2 |
| <b>Figure S3.</b> <sup>1</sup> H NMR spectrum of apigenin in CD <sub>3</sub> OD (400 MHz) .....                                                            | 3 |
| <b>Figure S4.</b> <sup>1</sup> H NMR spectrum of methyl caffeate in CD <sub>3</sub> OD (400 MHz) .....                                                     | 3 |
| <b>Figure S5.</b> <sup>1</sup> H NMR spectrum of caffeic acid in CD <sub>3</sub> OD (400 MHz) .....                                                        | 4 |
| <b>Figure S6.</b> <sup>1</sup> H NMR spectrum of rosmarinic acid in CD <sub>3</sub> OD (400 MHz).....                                                      | 4 |
| <b>Figure S7.</b> Control of <i>Plasmopara viticola</i> on grapevine leaf discs through the application of <i>Glechoma hederacea</i> aqueous extracts..... | 5 |

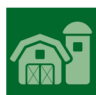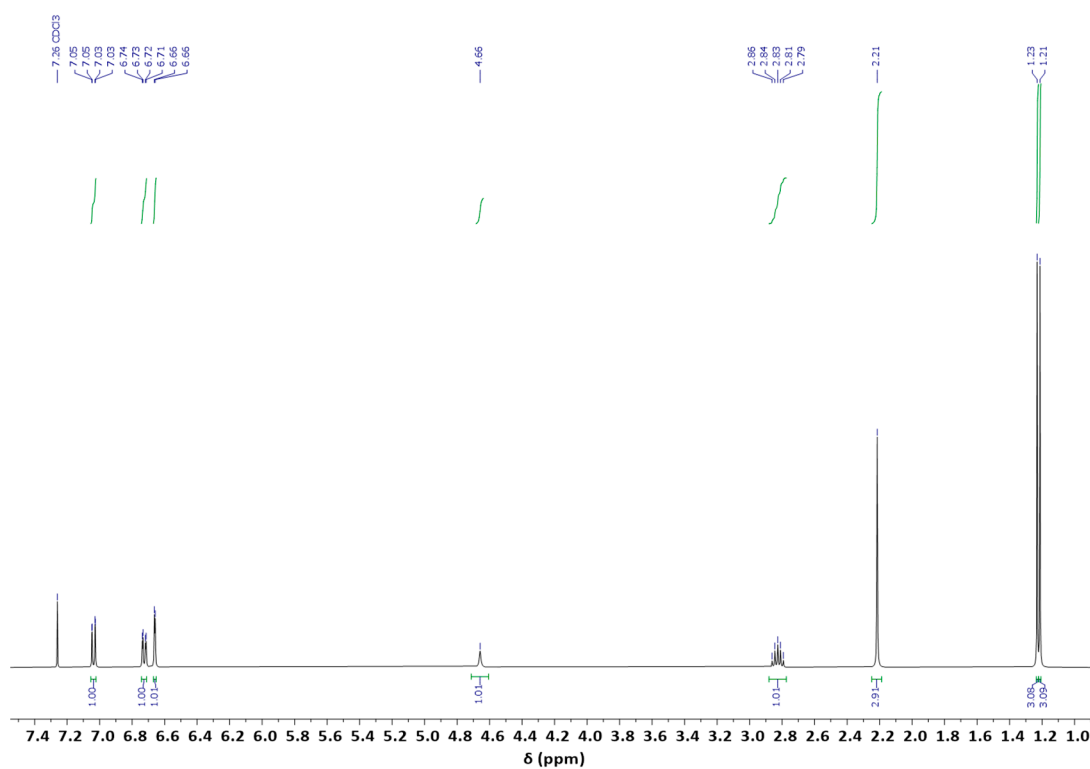

Figure S1. <sup>1</sup>H NMR spectrum of carvacrol in CDCl<sub>3</sub> (400 MHz)

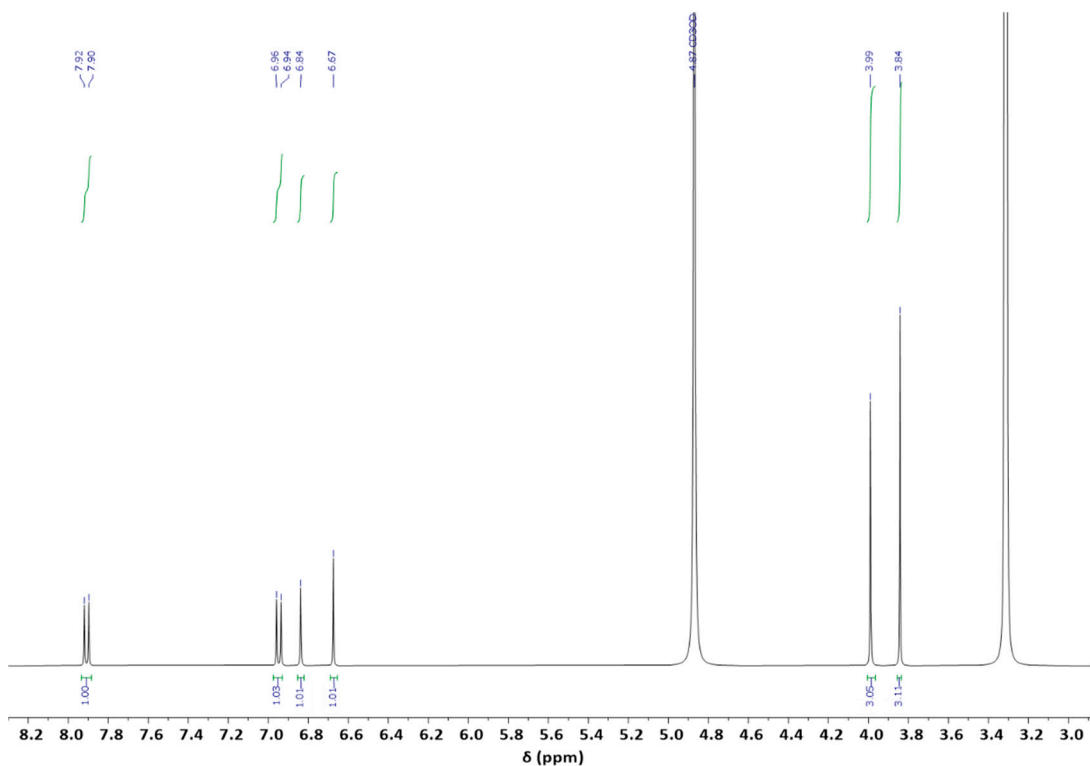

Figure S2. <sup>1</sup>H NMR spectrum of cirsimaritin in CD<sub>3</sub>OD (400 MHz)

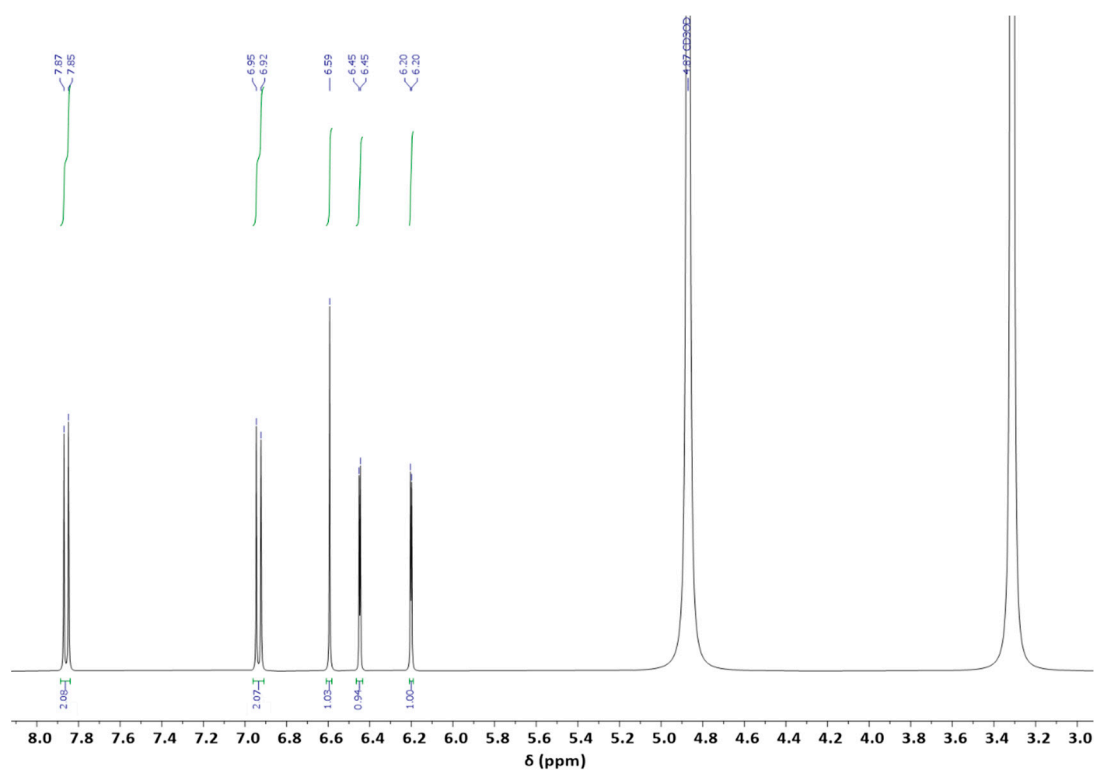

Figure S3. <sup>1</sup>H NMR spectrum of apigenin in CD<sub>3</sub>OD (400 MHz)

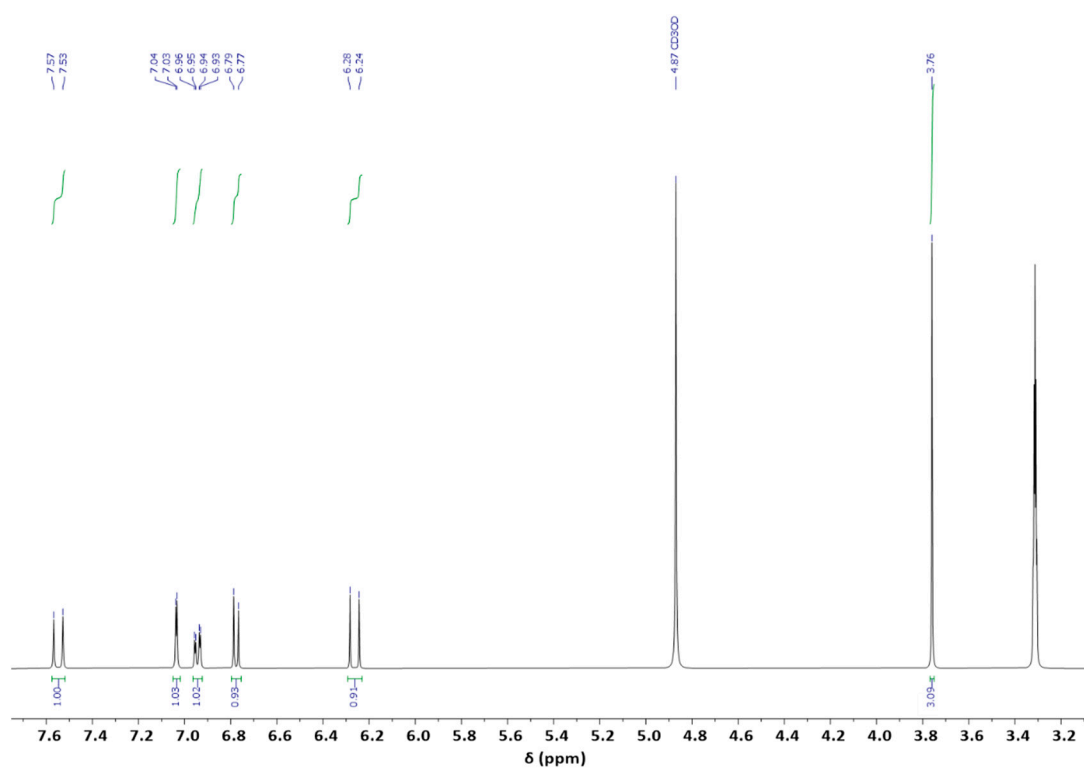

Figure S4. <sup>1</sup>H NMR spectrum of methyl caffeate in CD<sub>3</sub>OD (400 MHz)

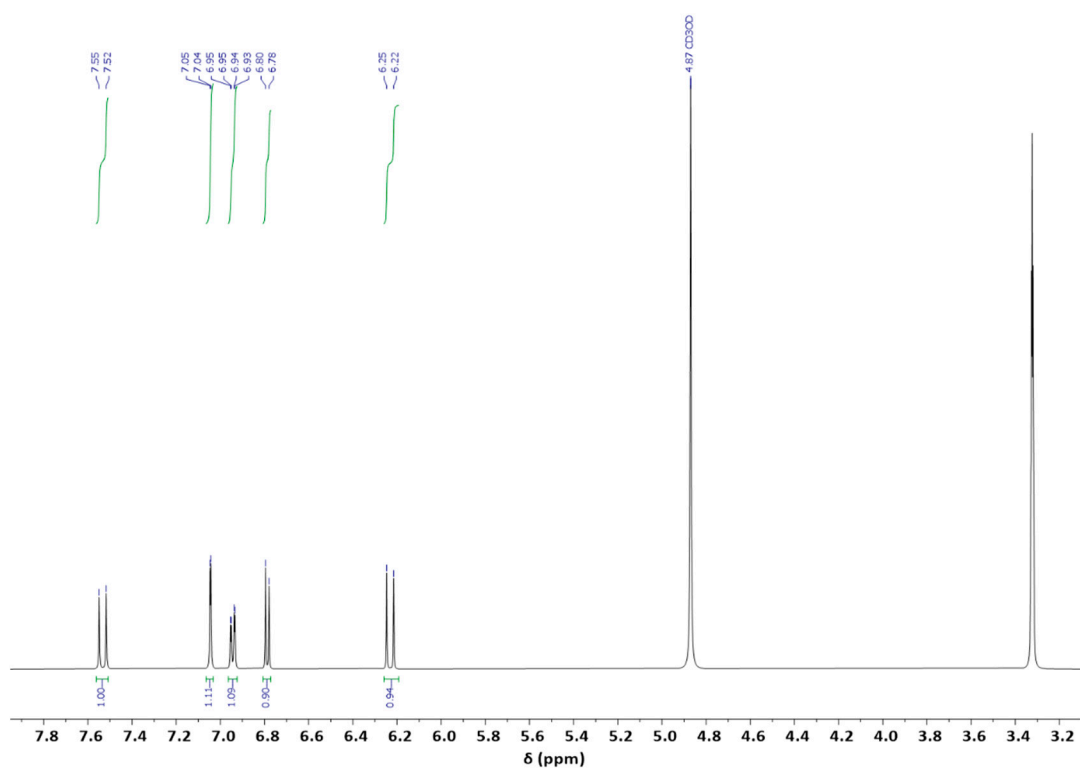

Figure S5. <sup>1</sup>H NMR spectrum of caffeic acid in CD<sub>3</sub>OD (400 MHz)

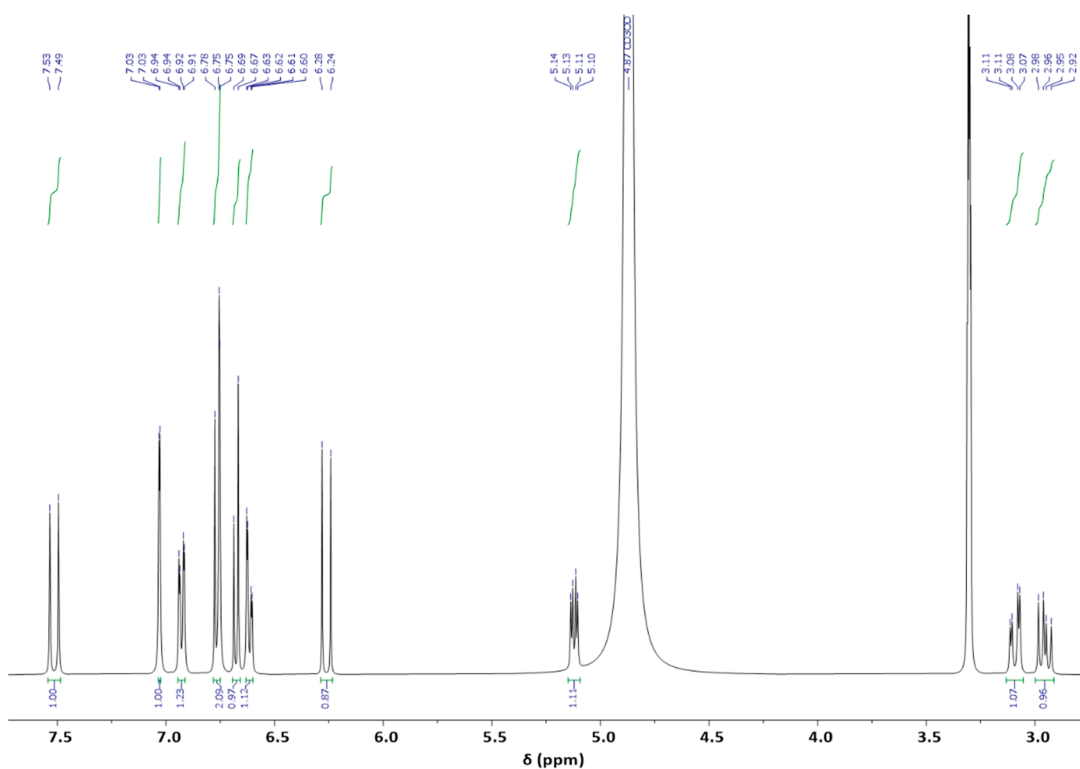

Figure S6. <sup>1</sup>H NMR spectrum of rosmarinic acid in CD<sub>3</sub>OD (400 MHz)

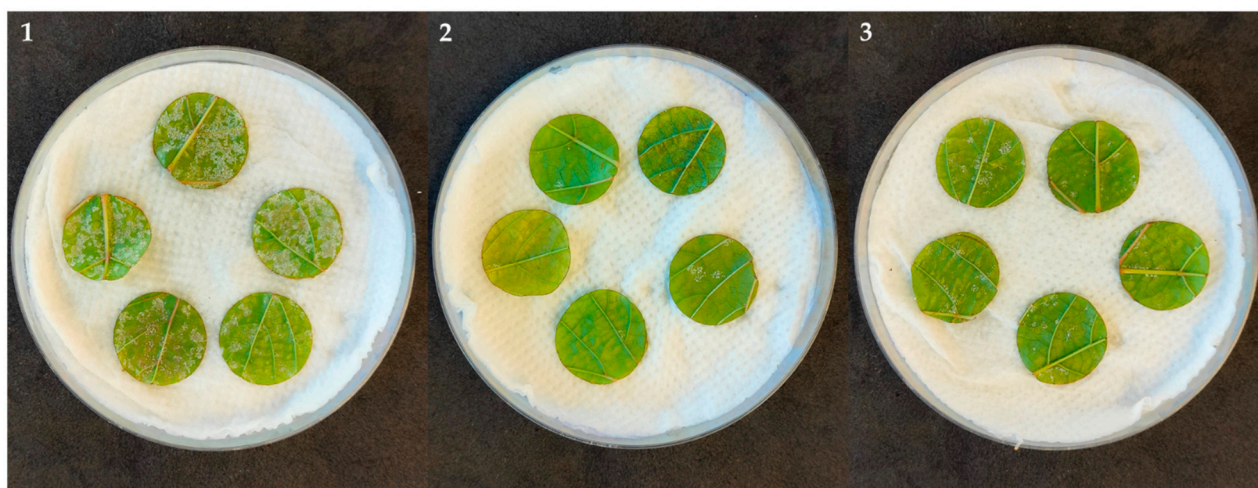

**Figure S7.** Control of *Plasmopara viticola* on grapevine leaf discs through the application of *Glechoma hederacea* aqueous extracts. Representative photographs showing the effect of the application of treatments in controlling *P. viticola* on grapevine leaf discs. The treatments evaluated were: (1) grapevine leaf discs treated with distilled water; (2) grapevine leaf discs treated with copper hydroxide (2 g/L) and (3) grapevine leaf discs treated with *G. hederacea* aqueous extracts.
